# Supplementary material for: Eco-friendly volatile additive enabling efficient large-area organic photovoltaic module processed with non-halogenated solvent
Source: Royal Society of Chemistry journal article supplement (doi:10.1039/d4ee01405g), 2024-01-01
Supplement: d4ee01405g1.pdf [file d4ee01405g1.pdf]

**Eco-friendly volatile additive enabling efficient large-area organic photovoltaic  
module processed with non-halogenated solvent**

**Ziyan Jia, ‡<sup>a,b</sup> Jiannan Pan, ‡<sup>a</sup> Xu Chen,<sup>a</sup> Yaohui Li,<sup>a</sup> Tianyu Liu,<sup>a</sup> Hanbo Zhu,  
<sup>a</sup> Jizhong Yao,<sup>c</sup> Buyi Yan<sup>c</sup> and Yang (Michael) Yang<sup>\*a,b</sup>**

<sup>a</sup> State Key Laboratory of Modern Optical Instrumentation, College of Optical Science and Engineering, Zhejiang University, Hangzhou, Zhejiang 310027, China

<sup>b</sup> Intelligent Optics & Photonics Research Center, Jiaxing Research Institute of Zhejiang University, Jiaxing, Zhejiang 314041, China

<sup>c</sup> Hangzhou Microquanta Semiconductor Co. LTD., Hangzhou, Zhejiang 310027, China

‡ These authors contributed equally: Ziyan Jia, Jiannan Pan.

E-mail: yangyang15@zju.edu.cn

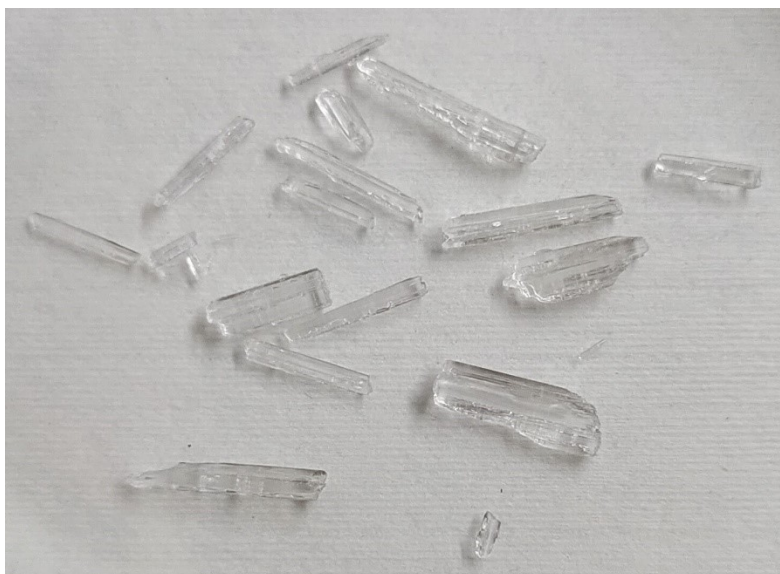

**Figure S1.** The shape and appearance of MT.

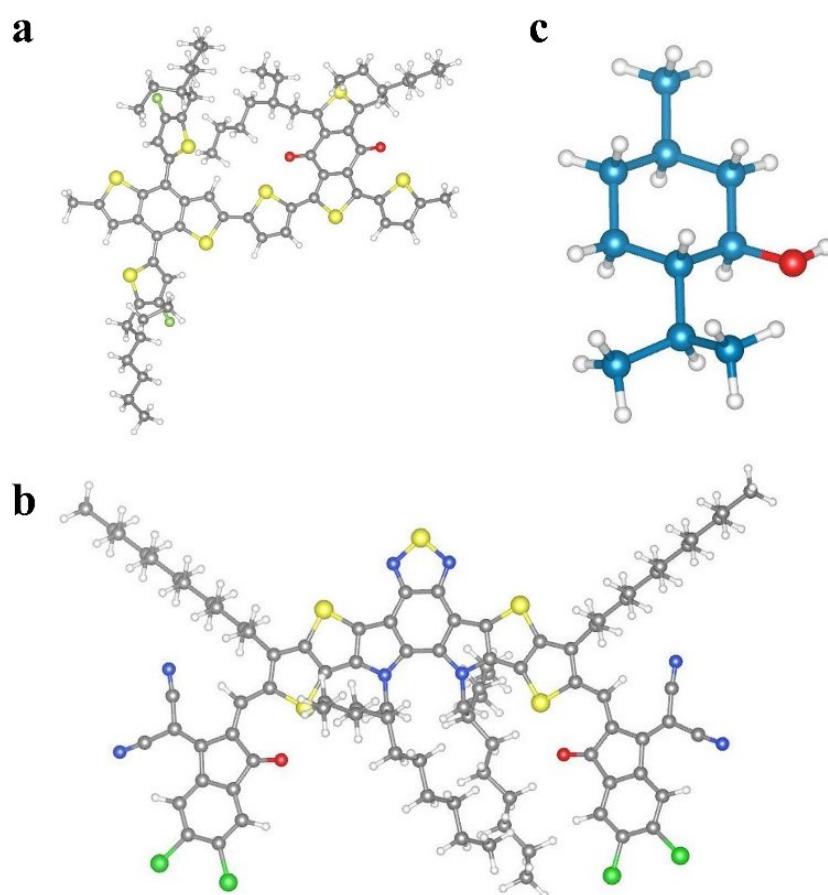

**Figure S2.** The optimized geometry structures of a) PM6, b) BO-4Cl, and c) MT.

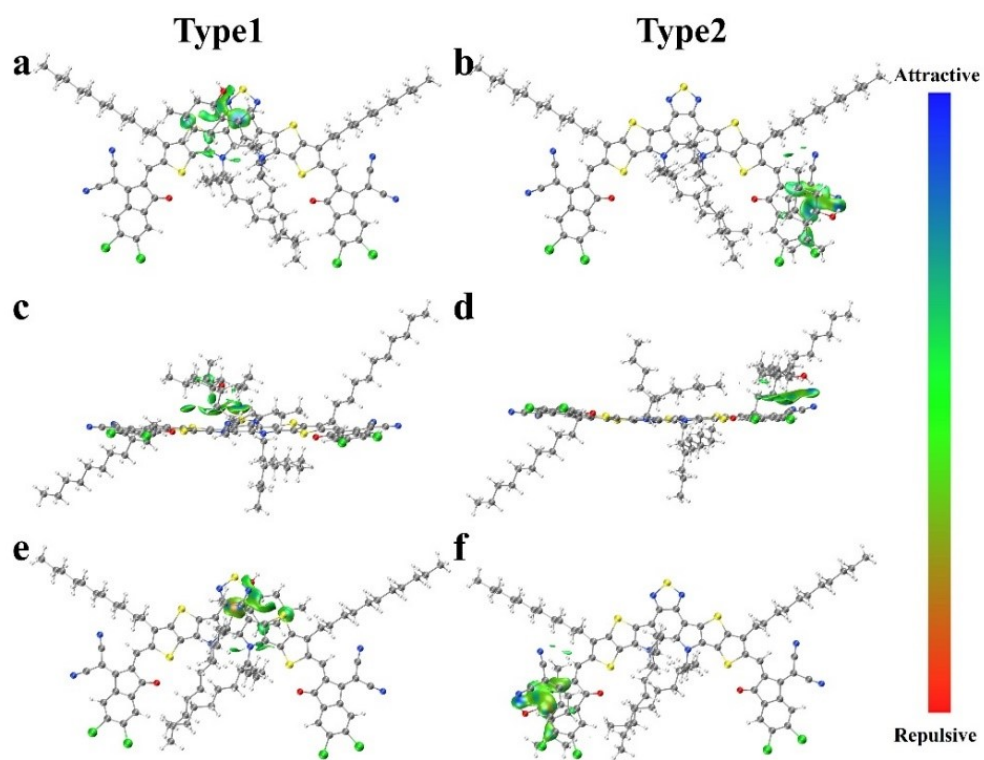

**Figure S3.** The non-covalent interaction (NCI) graphs by IGM approach for two types of combinations between BO-4Cl and MT from the front view (a, b), bottom view (c, d) and the back view (e, f), respectively.

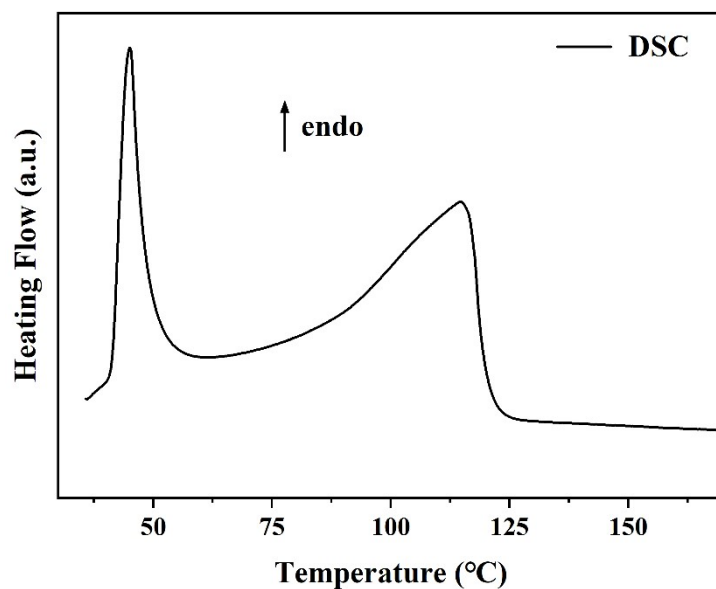

**Figure S4.** The DSC thermogram of MT under N<sub>2</sub> at a scan rate of 5°C min<sup>-1</sup>.

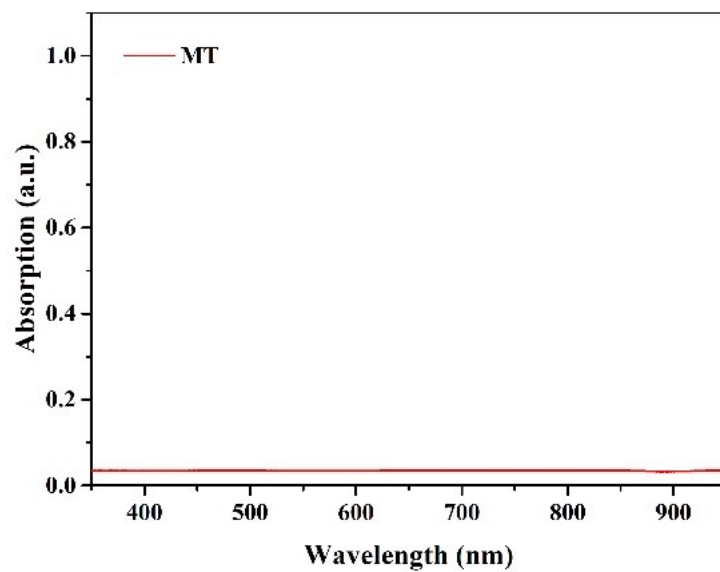

**Figure S5.** The UV-vis spectrum of MT film.

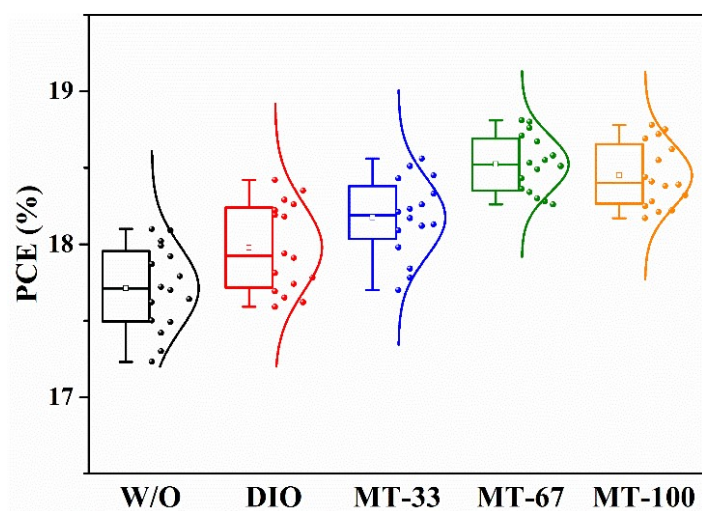

**Figure S6.** The average PCEs of the devices processed by diverse additives.

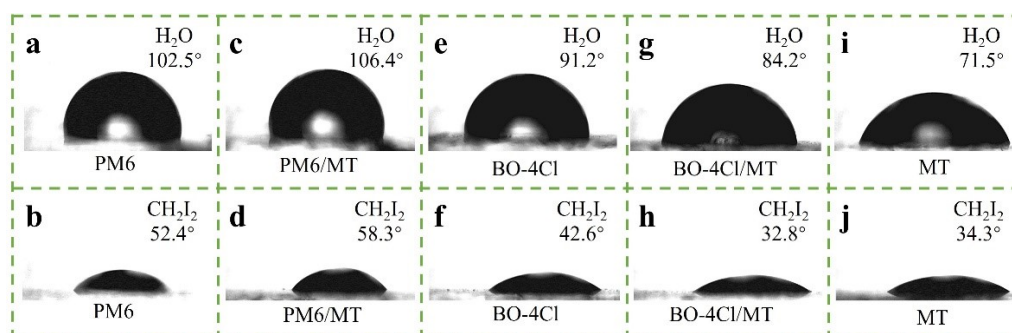

**Figure S7.** The images of the water and the diiodomethane droplet contact angles on the surfaces of PM6, PM6/MT, BO-4Cl, BO-4Cl/MT, and MT films.

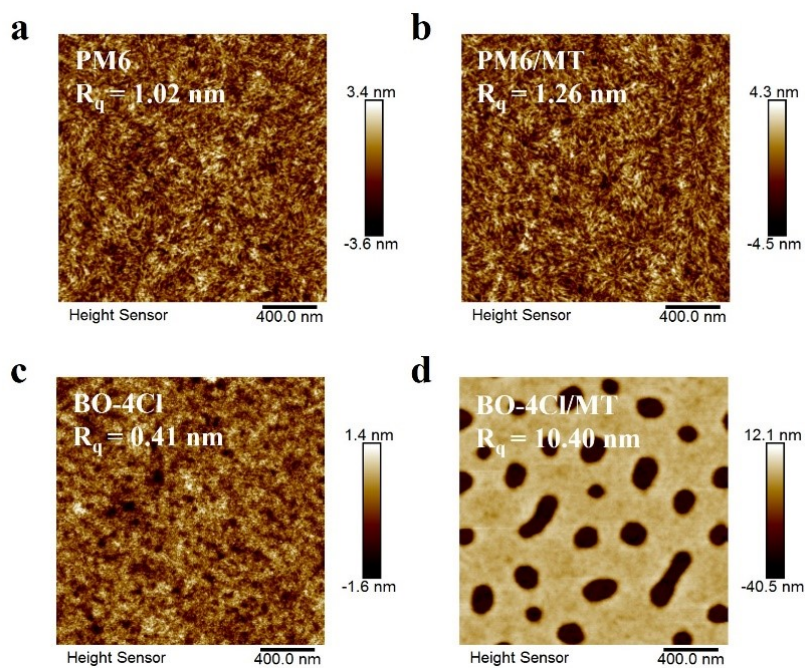

**Figure S8.** The AFM images ( $2 \mu\text{m} \times 2 \mu\text{m}$ ) and  $R_q$  values of a) PM6, b) PM6/MT, c) BO-4Cl, and d) BO-4Cl/MT films.

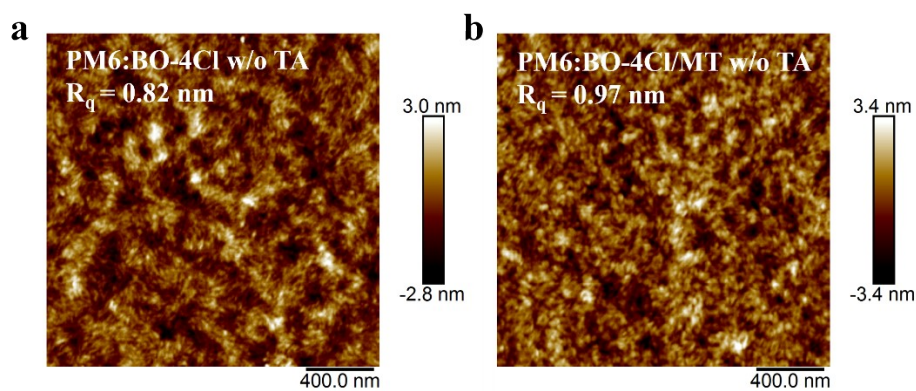

**Figure S9.** The AFM images ( $2 \mu\text{m} \times 2 \mu\text{m}$ ) and  $R_q$  values of a) PM6:BO-4Cl and b) PM6:BO-4Cl/MT films without thermal annealing (TA).

## Measurement Report

Report No. **23TR032901**

**Client Name** Zhejiang University  
**Client Address** No. 38 Zheda Road, West Lake District, Hangzhou, Zhejiang  
**Sample** Organic photovoltaic module  
**Manufacturer** Zhejiang University, Yang Yang Group  
**Measurement Date** 29<sup>th</sup> March, 2023  
**Performed by:** Qiang Shi *Qiang Shi* Date: 29/03/2023  
**Reviewed by:** Wenjie Zhao *Wenjie Zhao* Date: 29/03/2023  
**Approved by:** Zhengxin Liu *Zhengxin Liu* Date: 05/04/2023  
**Address:** No.235 Chengbei Road, Jiaoding, Shanghai **Post Code:** 201800  
**E-mail:** solarcell@mail.sim.ac.cn **Tel:** +86-021-69976921

The measurement report without signature and seal are not valid.  
 This report shall not be reproduced, except in full, without the approval of SIMIT.

1 / 4

### Sample Information

|                         |                             |
|-------------------------|-----------------------------|
| Sample Type             | Organic Photovoltaic Module |
| Serial No.              | Q38#                        |
| Lab Internal No.        | 23032901-1#                 |
| Measurement Item        | I-V characteristic          |
| Measurement Environment | 23.8±2.0°C, 31.5±5.0%RH     |

### Measurement of I-V characteristic

|                                                                 |                                                                                                                                                                                                                                                 |
|-----------------------------------------------------------------|-------------------------------------------------------------------------------------------------------------------------------------------------------------------------------------------------------------------------------------------------|
| <b>Reference cell</b>                                           | PVM 1121                                                                                                                                                                                                                                        |
| <b>Reference cell Type</b>                                      | mono-Si, WPVS, calibrated by NREL (Certificate No. ISO 2075)                                                                                                                                                                                    |
| <b>Calibration Value/Date of Calibration for Reference cell</b> | 144.53mA / Feb. 2023                                                                                                                                                                                                                            |
| <b>Measurement Conditions</b>                                   | Spectral Distribution: AM1.5 according to IEC 60904-3 Ed.3,<br>Irradiance: 1000±50W/m <sup>2</sup><br>Temperature: 25.0±2.0°C                                                                                                                   |
| <b>Measurement Equipment/ Date of Calibration</b>               | AAA Steady State Solar Simulator (YSS-T155-2M) / July 2022<br>IV test system (ADCMIT 6246) / June 2022<br>SR Measurement system (CEP-25ML-CAS) / April 2022<br>Measuring Microscope (MF-82017C) / July 2022                                     |
| <b>Measurement Method</b>                                       | I-V Measurement:<br>Logarithmic sweep in both directions (Voc to Isc and Isc to Voc) during one flash based on IEC 60904-1:2006;<br>Spectral Mismatch factor was calculated according to IEC 60904-7 and I-V correction according to IEC 60891. |
| <b>Measurement Uncertainty</b>                                  | Area: 0.9%(k=2); Isc: 1.9%(k=2); Voc: 1.0%(k=2); Pmax: 2.5%(k=2); Eff: 2.6%(k=2)                                                                                                                                                                |

2 / 4

### Measurement Results

|      | Forward Scan<br>(Isc to Voc) | Reverse Scan<br>(Voc to Isc) |
|------|------------------------------|------------------------------|
| Area | 19.31cm <sup>2</sup>         |                              |
| Isc  | 68.049 mA                    | 67.995 mA                    |
| Voc  | 6.043 V                      | 6.049 V                      |
| Pmax | 288.646 mW                   | 288.398 mW                   |
| Ipm  | 61.011 mA                    | 61.030 mA                    |
| Vpm  | 4.731 V                      | 4.726 V                      |
| FF   | 70.19 %                      | 70.12 %                      |
| Eff  | 14.95 %                      | 14.94 %                      |

- Spectral Mismatch Factor SMM=0.9842.
- Designated illumination area defined by a thin metal mask was measured by a measuring microscope.
- Test results listed in this measurement report refer exclusively to the mentioned test sample.
- The results apply only at the time of the test, and do not imply future performance.

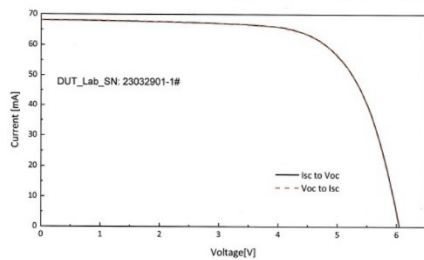

Fig.1 I-V curves of the measured sample

3 / 4

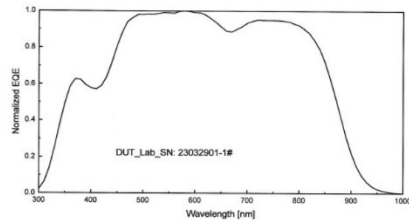

Fig.2 Normalized EQE curve of the measured sample

-----End of Report-----

4 / 4

**Figure S10.** Independent certification results of the large-area module (19.31 cm<sup>2</sup>) based on the PM6:BO-4Cl device from Shanghai Institute of Microsystem and Information Technology, Chinese Academy of Sciences, confirming a high PCE of 14.95% (Certificate No. 23TR032901).

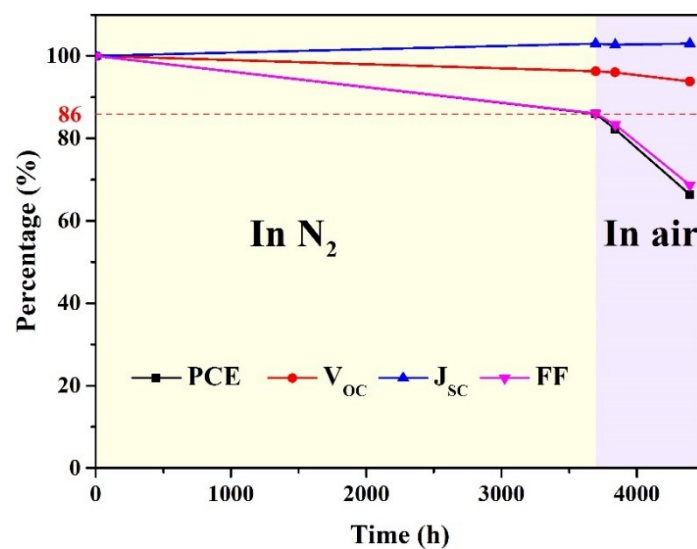

**Figure S11.** The shelf stability of the encapsulated large-area module processed with o-XY.

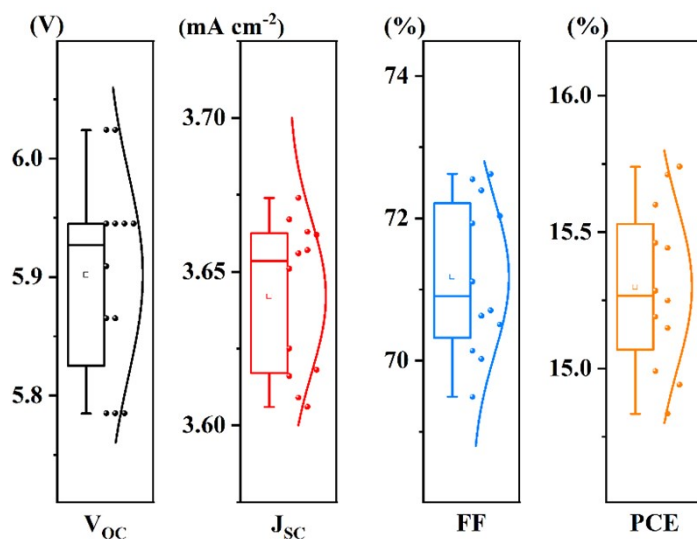

**Figure S12.** Statistics of the photovoltaic parameters from 12 large-area modules.

**Table S1.** The calculated results of the binding energy between BO-4Cl and MT.

| Condition                 | E (Hartree) | E (kcal/mol) |
|---------------------------|-------------|--------------|
| $E_{\text{BO-4Cl}}$       | -7901.331   | \            |
| $E_{\text{MT}}$           | -467.481    | \            |
| $E_{\text{type1}}$        | -8368.840   | \            |
| $E_{\text{type2}}$        | -8368.842   | \            |
| $\Delta E_{\text{type1}}$ | -0.028      | -17.650      |
| $\Delta E_{\text{type2}}$ | -0.030      | -18.788      |

**Table S2.** Detailed photovoltaic parameters of devices under different conditions.

| Condition         | V <sub>OC</sub> (V) | J <sub>SC</sub> (mA cm <sup>-2</sup> ) | FF (%) | PCE <sub>max</sub> (%) | PCE <sub>avg</sub> <sup>a</sup> (%) |
|-------------------|---------------------|----------------------------------------|--------|------------------------|-------------------------------------|
| PM6:BO-4Cl        | 0.853               | 27.55                                  | 76.95  | 18.09                  | 17.71±0.28                          |
| PM6:BO-4Cl/DIO    | 0.835               | 28.06                                  | 78.62  | 18.42                  | 17.98±0.29                          |
| PM6:BO-4Cl/MT-33  | 0.853               | 28.19                                  | 77.17  | 18.56                  | 18.17±0.26                          |
| PM6:BO-4Cl/MT-67  | 0.853               | 28.35                                  | 77.76  | 18.81                  | 18.52±0.19                          |
| PM6:BO-4Cl/MT-100 | 0.844               | 28.55                                  | 77.92  | 18.78                  | 18.45±0.21                          |

<sup>a</sup> Average data were obtained from 16 independent devices.

**Table S3.** Summary of representative high-performance binary OPVs (PCE > 17%) based on PM6 processed by non-halogenated solvents.

| Active layer | Solvent              | V <sub>OC</sub> (V) | J <sub>SC</sub> (mA cm <sup>-2</sup> ) | FF (%) | PCE (%) | Ref.      |
|--------------|----------------------|---------------------|----------------------------------------|--------|---------|-----------|
| PM6:L8-BO    | o-XY                 | 0.867               | 25.37                                  | 77.23  | 17.07   | 1         |
| PM6:BTP-eC9  | o-XY                 | 0.84                | 26.8                                   | 76.3   | 17.2    | 2         |
| PM6:BO-4Cl   | Tol                  | 0.854               | 26.1                                   | 77.7   | 17.33   | 3         |
| PM6: BTP-eC9 | o-XY:CS <sub>2</sub> | 0.85                | 26.2                                   | 78.9   | 17.6    | 4         |
| PM6:BO-4Cl   | o-XY                 | 0.84                | 26.7                                   | 79.0   | 17.7    | 5         |
| PM6:Y6-BO    | o-XY                 | 0.832               | 27.3                                   | 78.4   | 17.8    | 6         |
| PM6:BO-4Cl   | o-XY                 | 0.847               | 26.86                                  | 79.63  | 18.12   | 7         |
| PM6:EV-i     | o-XY                 | 0.897               | 26.60                                  | 76.56  | 18.27   | 8         |
| PM6:L8-Ph    | o-XY                 | 0.870               | 26.40                                  | 80.11  | 18.40   | 9         |
| PM6:BTP-eC9  | o-XY                 | 0.847               | 27.22                                  | 80.31  | 18.52   | 7         |
| PM6:BO-4Cl   | o-XY                 | 0.853               | 28.35                                  | 77.76  | 18.81   | This Work |

**Table S4.** The photovoltaic parameters calculated from J<sub>ph</sub>-V<sub>eff</sub> curves.

| Condition     | J <sub>sat</sub> (mA cm <sup>-2</sup> ) | J <sub>ph</sub> <sup>a</sup> (mA cm <sup>-2</sup> ) | J <sub>ph</sub> <sup>b</sup> (mA cm <sup>-2</sup> ) | P <sub>diss</sub> (%) | P <sub>coll</sub> (%) |
|---------------|-----------------------------------------|-----------------------------------------------------|-----------------------------------------------------|-----------------------|-----------------------|
| PM6:BO-4Cl    | 27.94                                   | 27.26                                               | 25.01                                               | 97.57                 | 89.51                 |
| PM6:BO-4Cl/MT | 28.83                                   | 28.38                                               | 26.02                                               | 98.44                 | 90.25                 |

<sup>a</sup> J<sub>ph</sub> under short circuit conditions.

<sup>b</sup> J<sub>ph</sub> under maximal power output conditions.



**Table S5.** The hole and electron mobilities of devices.

| Condition     | $\mu_h$ ( $10^{-4} \text{ cm}^2 \text{ V}^{-1} \text{ s}^{-1}$ ) | $\mu_e$ ( $10^{-4} \text{ cm}^2 \text{ V}^{-1} \text{ s}^{-1}$ ) | $\mu_h/\mu_e$ |
|---------------|------------------------------------------------------------------|------------------------------------------------------------------|---------------|
| PM6:BO-4Cl    | 5.19                                                             | 13.30                                                            | 0.39          |
| PM6:BO-4Cl/MT | 5.88                                                             | 14.20                                                            | 0.41          |

**Table S6.** The calculated surface tensions of the films based on the OWRK model.

| Film      | $\gamma$ ( $\text{mN m}^{-1}$ ) |
|-----------|---------------------------------|
| PM6       | 33.12                           |
| PM6/MT    | 29.86                           |
| BO-4Cl    | 38.35                           |
| BO-4Cl/MT | 43.42                           |
| MT        | 45.85                           |

**Table S7.** The interaction parameters of the films based on the Flory-Huggins model.

| Film            | $\chi$ |
|-----------------|--------|
| PM6:BO-4Cl      | 0.192  |
| PM6:MT          | 1.033  |
| BO-4Cl:MT       | 0.335  |
| PM6:(BO-4Cl/MT) | 0.696  |
| BO-4Cl:(PM6/MT) | 0.531  |

**Table S8.** Data for GIWAXS measurements.

| Condition         | Blend         | Location ( $\text{\AA}^{-1}$ ) | d-spacing ( $\text{\AA}$ ) | FWHM ( $\text{\AA}^{-1}$ ) | CCL ( $\text{\AA}$ ) |
|-------------------|---------------|--------------------------------|----------------------------|----------------------------|----------------------|
| $Q_{xy}$<br>(100) | PM6:BO-4Cl    | 0.272                          | 23.100                     | 0.148                      | 38.209               |
|                   | PM6:BO-4Cl/MT | 0.271                          | 23.185                     | 0.079                      | 71.581               |
| $Q_z$<br>(010)    | PM6:BO-4Cl    | 1.725                          | 3.642                      | 0.267                      | 21.179               |
|                   | PM6:BO-4Cl/MT | 1.732                          | 3.628                      | 0.224                      | 25.245               |

**Table S9.** The universal study about MT in other binary systems.

| Active layer <sup>a</sup> | Solvent | V <sub>oc</sub><br>(V) | J <sub>sc</sub><br>(mA cm <sup>-2</sup> ) | FF<br>(%) | PCE <sub>max</sub><br>(%) | PCE <sub>avg</sub> <sup>b</sup><br>(%) |
|---------------------------|---------|------------------------|-------------------------------------------|-----------|---------------------------|----------------------------------------|
| PM6:L8-BO                 | o-XY    | 0.875                  | 25.50                                     | 77.63     | 17.32                     | 17.06±0.17                             |
| PM6:L8-BO/MT              | o-XY    | 0.875                  | 26.23                                     | 78.52     | 18.02                     | 17.68±0.21                             |
| PM6:L8-BO                 | CF      | 0.901                  | 24.65                                     | 73.15     | 16.25                     | 16.01±0.14                             |
| PM6:L8-BO/MT              | CF      | 0.899                  | 25.29                                     | 74.81     | 17.01                     | 16.69±0.19                             |
| PM6:BO-4Cl                | CF      | 0.868                  | 26.37                                     | 74.36     | 17.02                     | 16.65±0.24                             |
| PM6:BO-4Cl/MT             | CF      | 0.869                  | 27.09                                     | 75.35     | 17.74                     | 17.35±0.27                             |
| D18:L8-BO                 | CF      | 0.917                  | 25.13                                     | 74.47     | 17.16                     | 16.87±0.15                             |
| D18:L8-BO/MT              | CF      | 0.919                  | 25.36                                     | 75.97     | 17.71                     | 17.38±0.22                             |

<sup>a</sup> PM6:L8-BO: 22 mg mL<sup>-1</sup> in o-XY, 17 mg mL<sup>-1</sup> in CF; PM6:BO-4Cl: 16 mg mL<sup>-1</sup> in CF; D18:L8-BO: 11 mg mL<sup>-1</sup> in CF.

<sup>b</sup> Average data were obtained from 16 independent devices.

**Table S10.** Summary of the photovoltaic parameters for recently reported large-area organic photovoltaic devices processed by non-halogenated solvents.

| Active layer                     | Solvent | Area (cm <sup>2</sup> ) | PCE (%) | Ref.      |
|----------------------------------|---------|-------------------------|---------|-----------|
| PTQ10:PYF-T-o                    | o-XY    | 1                       | 11.24   | 10        |
| PBSF-D12:IT-4F                   | Tol     | 1                       | 11.9    | 11        |
| PM6:BTP-eC9                      | o-XY    | 1                       | 15.5    | 12        |
| PM6:PYTCl-A                      | Tol     | 1.21                    | 14.7    | 13        |
| PTB7-Th:PC <sub>71</sub> BM      | 2-mMA   | 16                      | 7.5     | 14        |
| PM6:PY-82:PY-DT                  | o-XY    | 16.5                    | 13.84   | 15        |
| PM6:DTY6                         | o-XY    | 18                      | 14.4    | 16        |
| PM6:BTP-eC9                      | o-XY    | 25                      | 11.29   | 12        |
| PM6:CH7                          | o-XY    | 25.2                    | 14.42   | 17        |
| PM6:Y6                           | o-XY    | 28.82                   | 12.64   | 18        |
| PBDB-T-2F(3/4):Y6-HU             | THF     | 31.50                   | 6.26    | 19        |
| PM6:Y6-HU                        | o-XY    | 31.50                   | 12.44   | 20        |
| PV2300:PV-A3:PC <sub>61</sub> BM | o-XY    | 32.6                    | 10.3    | 21        |
| PM6:Y6: BTO:PC <sub>71</sub> BM  | p-XY    | 36                      | 14.26   | 22        |
| PTB7-Th:EH-IDTBR:T2-OEHRH        | Tol     | 55.5                    | 9.32    | 23        |
| PF2:PC <sub>71</sub> BM          | o-XY    | 66                      | 6.1     | 24        |
| PM6:L8-BO:BTP-S8:BTP-S2          | Tol     | 72.25                   | 12.78   | 25        |
| PM6:BO-4Cl                       | o-XY    | 19.31                   | 15.74   | This Work |

## REFERENCES

1. Xue, J.; Zhao, H.; Lin, B.; Wang, Y.; Zhu, Q.; Lu, G.; Wu, B.; Bi, Z.; Zhou, X.; Zhao, C.; Lu, G.; Zhou, K.; Ma, W., Nonhalogenated Dual-Slot-Die Processing Enables High-Efficiency Organic Solar Cells. *Adv. Mater.* **2022**, *34* (31), e2202659.
2. Li, H. J.; Liu, S. Q.; Wu, X. T.; Qi, Q. C.; Zhang, H. Y.; Meng, X. C.; Hu, X. T.; Ye, L.; Chen, Y. W., A general enlarging shear impulse approach to green printing large-area and efficient organic photovoltaics. *Energy Environ. Sci.* **2022**, *15* (5), 2130-2138.
3. Xu, X. P.; Yu, L. Y.; Yan, H.; Li, R. P.; Peng, Q., Highly efficient non-fullerene organic solar cells enabled by a delayed processing method using a non-halogenated solvent. *Energy Environ. Sci.* **2020**, *13* (11), 4381-4388.
4. Song, X.; Sun, P.; Sun, D.; Xu, Y.; Liu, Y.; Zhu, W., Investigation of tunable halogen-free solvent engineering on aggregation and miscibility towards high-performance organic solar cells. *Nano Energy* **2022**, *91*, 106678.
5. Wang, D.; Zhou, G. Q.; Li, Y. H.; Yan, K. R.; Zhan, L. L.; Zhu, H. M.; Lu, X. H.; Chen, H. Z.; Li, C. Z., High-Performance Organic Solar Cells from Non-Halogenated Solvents. *Adv. Funct. Mater.* **2022**, *32* (4), 2107827.
6. Jing, J.; Dong, S.; Zhang, K.; Xie, B.; Zhang, J.; Song, Y.; Huang, F., In-situ self-organized anode interlayer enables organic solar cells with simultaneously simplified processing and greatly improved efficiency to 17.8%. *Nano Energy* **2022**, *93*, 106814.
7. Yang, C.; Jiang, M.; Wang, S.; Zhang, B.; Mao, P.; Woo, H. Y.; Zhang, F.; Wang, J. L.; An, Q., Hot-casting Strategy Empowers High-Boiling Solvent-Processed Organic Solar Cells with Over 18.5% Efficiency. *Adv. Mater.* **2023**, e2305356.
8. Zhuo, H.; Li, X.; Zhang, J.; Qin, S.; Guo, J.; Zhou, R.; Jiang, X.; Wu, X.; Chen, Z.; Li, J.; Meng, L.; Li, Y., Giant Molecule Acceptor Enables Highly Efficient Organic Solar Cells Processed Using Non-halogenated Solvent. *Angew. Chem., Int. Ed.* **2023**, *62* (26), e202303551.
9. Wu, X.; Jiang, X.; Li, X.; Zhang, J.; Ding, K.; Zhuo, H.; Guo, J.; Li, J.; Meng, L.; Ade, H.; Li, Y., Introducing a Phenyl End Group in the Inner Side Chains of A-DA'D-A Acceptors Enables High-Efficiency Organic Solar Cells Processed with Nonhalogenated Solvent. *Adv. Mater.* **2023**, e2302946.
10. Shen, Y.-F.; Zhang, J.; Tian, C.; Qiu, D.; Wei, Z., Slot-die coated large-area flexible all-

polymer solar cells by non-halogenated solvent. *Nano Res.* **2023**.

11. Wang, K.; Li, W.; Guo, X.; Zhu, Q.; Fan, Q.; Guo, Q.; Ma, W.; Zhang, M., Optimizing the Alkyl Side-Chain Design of a Wide Band-Gap Polymer Donor for Attaining Nonfullerene Organic Solar Cells with High Efficiency Using a Nonhalogenated Solvent. *Chem. Mater.* **2021**, *33* (15), 5981-5990.
12. Li, H. J.; Liu, S. Q.; Wu, X. T.; Qi, Q. C.; Zhang, H. Y.; Meng, X. C.; Hu, X. T.; Ye, L.; Chen, Y. W., A general enlarging shear impulse approach to green printing large-area and efficient organic photovoltaics. *Energy Environ. Sci.* **2022**, *15* (5), 2130-2138.
13. Liu, J.; Deng, J.; Zhu, Y.; Geng, X.; Zhang, L.; Jeong, S. Y.; Zhou, D.; Woo, H. Y.; Chen, D.; Wu, F.; Chen, L., Regulation of Polymer Configurations Enables Green Solvent-Processed Large-Area Binary All-Polymer Solar Cells With Breakthrough Performance and High Efficiency Stretchability Factor. *Adv. Mater.* **2023**, *35* (1), e2208008.
14. Zhang, K.; Chen, Z.; Armin, A.; Dong, S.; Xia, R.; Yip, H. L.; Shoaee, S.; Huang, F.; Cao, Y., Efficient Large Area Organic Solar Cells Processed by Blade-Coating With Single-Component Green Solvent. *Sol. RRL* **2017**, *2* (1), 1700169.
15. Cai, Y.; Xie, C.; Li, Q.; Liu, C.; Gao, J.; Jee, M. H.; Qiao, J.; Li, Y.; Song, J.; Hao, X.; Woo, H. Y.; Tang, Z.; Zhou, Y.; Zhang, C.; Huang, H.; Sun, Y., Improved Molecular Ordering in a Ternary Blend Enables All-Polymer Solar Cells over 18% Efficiency. *Adv. Mater.* **2023**, *35* (8), e2208165.
16. Dong, S.; Jia, T.; Zhang, K.; Jing, J.; Huang, F., Single-Component Non-halogen Solvent-Processed High-Performance Organic Solar Cell Module with Efficiency over 14%. *Joule* **2020**, *4* (9), 2004-2016.
17. Zhang, S.; Chen, H.; Wang, P.; Li, S.; Li, Z.; Huang, Y.; Liu, J.; Yao, Z.; Li, C.; Wan, X.; Chen, Y., A Large Area Organic Solar Module with Non-Halogen Solvent Treatment, High Efficiency, and Decent Stability. *Sol. RRL* **2023**, *7* (7), 2300029.
18. Li, Y.; Wu, J.; Yi, X.; Liu, Z.; Liu, H.; Fu, Y.; Liu, J.; Xie, Z., Layer-by-layer blade-coated organic solar cells with non-halogenated solvents and non-halogenated additive via adjusting morphology and crystallization. *J. Mater. Chem. C* **2023**, *11* (39), 13263-13273.
19. Cho, H. W.; Jeong, S. Y.; Wu, Z.; Lim, H.; Park, W.-W.; Lee, W.; Suman Krishna, J. V.; Kwon, O.-H.; Kim, J. Y.; Woo, H. Y., A newly designed benzodithiophene building block: tuning

of the torsional barrier for non-halogenated and non-aromatic solvent-processible photovoltaic polymers. *J. Mater. Chem. A* **2023**, *11* (13), 7053-7065.

20. Rasool, S.; Kim, J. W.; Cho, H. W.; Kim, Y. J.; Lee, D. C.; Park, C. B.; Lee, W.; Kwon, O. H.; Cho, S.; Kim, J. Y., Morphologically Controlled Efficient Air-Processed Organic Solar Cells from Halogen-Free Solvent System. *Adv. Energy Mater.* **2022**, *13* (7), 2203452.

21. Liao, C.-Y.; Hsiao, Y.-T.; Tsai, K.-W.; Teng, N.-W.; Li, W.-L.; Wu, J.-L.; Kao, J.-C.; Lee, C.-C.; Yang, C.-M.; Tan, H.-S.; Chung, K.-H.; Chang, Y.-M., Photoactive Material for Highly Efficient and All Solution-Processed Organic Photovoltaic Modules: Study on the Efficiency, Stability, and Synthetic Complexity. *Sol. RRL* **2021**, *5* (3), 2000749.

22. Chen, H.; Zhang, R.; Chen, X.; Zeng, G.; Kobera, L.; Abbrent, S.; Zhang, B.; Chen, W.; Xu, G.; Oh, J.; Kang, S.-H.; Chen, S.; Yang, C.; Brus, J.; Hou, J.; Gao, F.; Li, Y.; Li, Y., A guest-assisted molecular-organization approach for >17% efficiency organic solar cells using environmentally friendly solvents. *Nat. Energy* **2021**, *6* (11), 1045-1053.

23. Lee, T.; Oh, S.; Rasool, S.; Song, C. E.; Kim, D.; Lee, S. K.; Shin, W. S.; Lim, E., Non-halogenated solvent-processed ternary-blend solar cells via alkyl-side-chain engineering of a non-fullerene acceptor and their application in large-area devices. *J. Mater. Chem. A* **2020**, *8* (20), 10318-10330.

24. Ibraikulov, O. A.; Wang, J.; Kamatham, N.; Heinrich, B.; Méry, S.; Kohlstädt, M.; Würfel, U.; Ferry, S.; Leclerc, N.; Heiser, T.; Lévêque, P., ITO-Free Organic Photovoltaic Modules Based on Fluorinated Polymers Deposited from Non-Halogenated Solution: A Major Step Toward Large-Scale Module Production. *Sol. RRL* **2019**, *3* (12), 1900273.

25. Kong, X.; Zhan, L.; Li, S.; Yin, S.; Qiu, H.; Fu, Y.; Lu, X.; Chen, Z.; Zhu, H.; Fu, W.; Chen, H., Spontaneous vertical phase distribution of multi-acceptors system enables high-efficiency organic photovoltaics in non-halogenated solvent and large-area module application. *Chem. Eng. J.* **2023**, *473*, 145201.
